# Supplementary material for: PUMA: A Unified Framework for Penalized Multiple Regression Analysis of GWAS Data
Source: PLOS journal article supplement (doi:10.1371/journal.pcbi.1003101), 2013-06-27

**Figure S11: Precision-Recall curves for perm-MCP for multiple values of eFPR and pre-screening p-value cutoff.** Simulations for 5000 samples, 20 causal markers and heritability of 50% using eFPR values ( $1 \times 10^{-3}, 1 \times 10^{-4}, 1 \times 10^{-5}, 1 \times 10^{-6}, 1 \times 10^{-7}$ ) and pre-screening cutoff values (0.1, 0.01, 0.001) indicated in the legend. Results from single marker analysis and MCP-2D are shown for comparison.

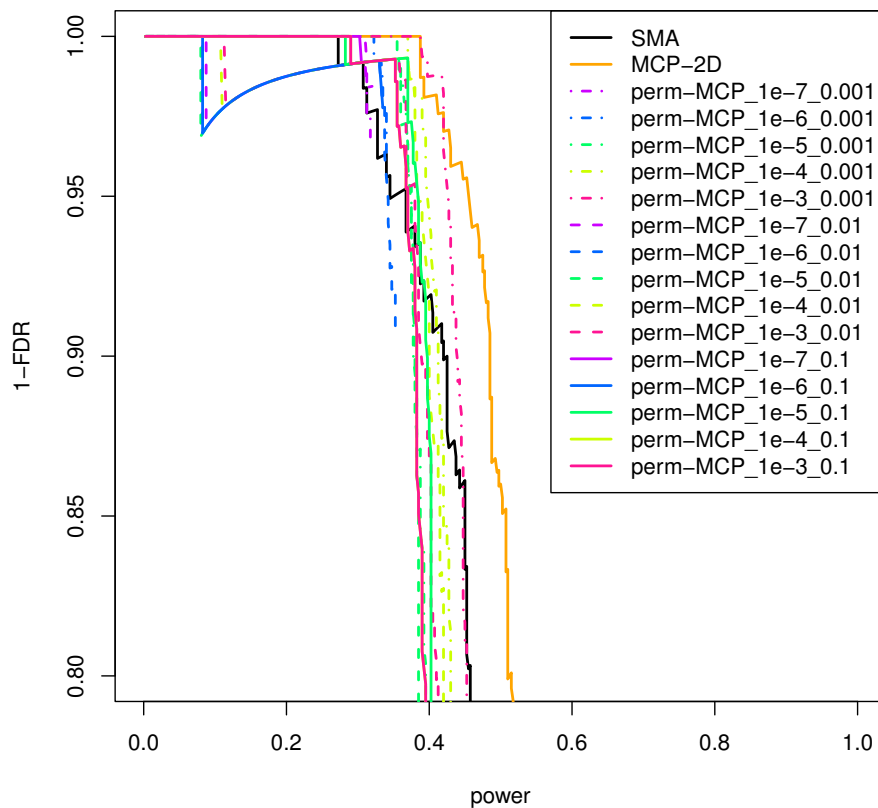

Supplement: S11 (10.1371/journal.pcbi.1003101.s011) [file journal.pcbi.1003101.s011]
