# Supplementary material for: PUMA: A Unified Framework for Penalized Multiple Regression Analysis of GWAS Data
Source: PLOS journal article supplement (doi:10.1371/journal.pcbi.1003101), 2013-06-27

**Figure S13:** Manhattan plots showing results of single marker analysis for **a)** Crohn's disease, **b)** Rheumatoid arthritis, and **c)** Type 1 diabetes datasets from our re-analysis. Shown are  $-\log_{10}$  p-values where large values are truncated at 20. Markers with  $-\log_{10}$  p-values  $> 6$  are colored green.

(a) Crohn's disease

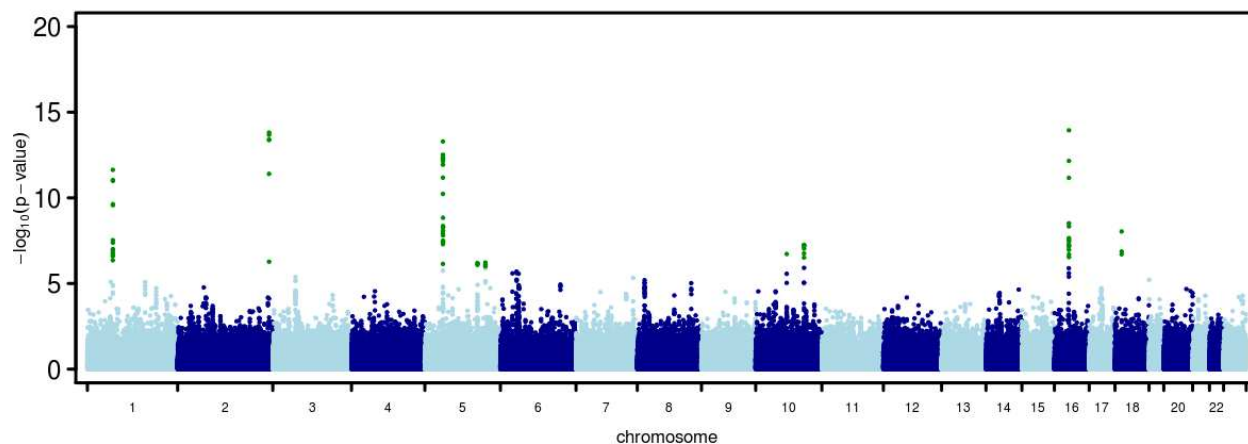

(b) Rheumatoid arthritis

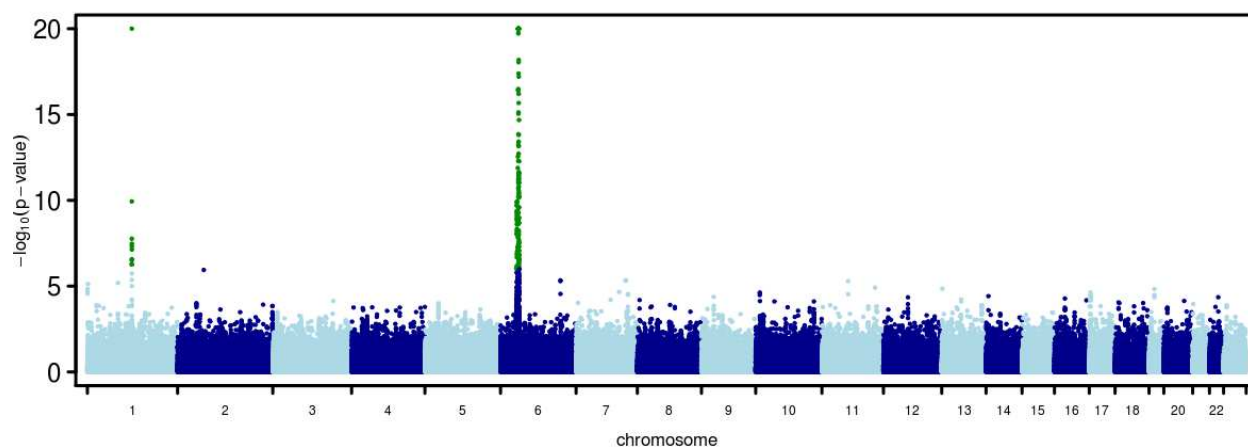

(c) Type 1 diabetes

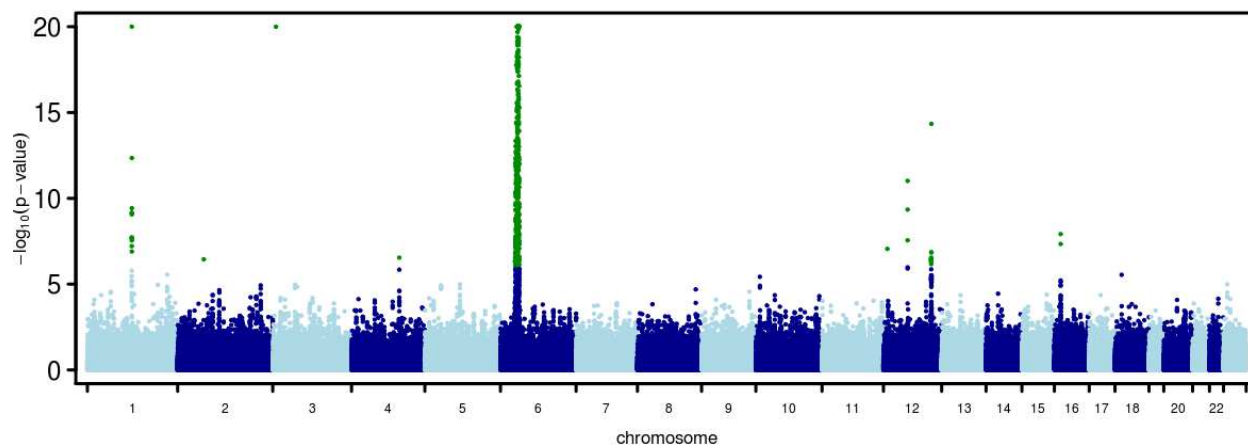

Supplement: S13 (10.1371/journal.pcbi.1003101.s013) [file journal.pcbi.1003101.s013]
