# Supplementary material for: PUMA: A Unified Framework for Penalized Multiple Regression Analysis of GWAS Data
Source: PLOS journal article supplement (doi:10.1371/journal.pcbi.1003101), 2013-06-27
Supplement: S23 (10.1371/journal.pcbi.1003101.s023) [file journal.pcbi.1003101.s023]

**Table S1:** Number of regions identified by a single marker analysis with a p-value  $< 1 \times 10^{-6}$  and the number of these regions that are recapitulated by each other method.

| disease | Method |             |      |       |                |        |     |     |        |          |
|---------|--------|-------------|------|-------|----------------|--------|-----|-----|--------|----------|
|         | SMA    | Conditional | VBAY | Lasso | Adaptive Lasso | 2D-MCP | LOG | NEG | 1D-MCP | perm-MCP |
| CD      | 9      | 9           | 7    | 6     | 5              | 8      | 6   | 7   | 6      | 6        |
| RA      | 1      | 1           | 1    | 1     | 1              | 1      | 1   | 1   | 1      | 1        |
| T1D     | 9      | 9           | 3    | 4     | 4              | 4      | 4   | 0   | 4      | 4        |
| Total   | 19     | 19          | 11   | 11    | 10             | 13     | 11  | 8   | 11     | 11       |
