# Supplementary material for: PUMA: A Unified Framework for Penalized Multiple Regression Analysis of GWAS Data
Source: PLOS journal article supplement (doi:10.1371/journal.pcbi.1003101), 2013-06-27
Supplement: S31 (10.1371/journal.pcbi.1003101.s031) [file journal.pcbi.1003101.s031]

# Supplementary Text S1

PUMA: A Unified Framework for Penalized Multiple Regression Analysis of GWAS Data

Gabriel E. Hoffman, Benjamin A. Logsdon, Jason G. Mezey

We ran hyperLasso following the instructions on the program website (<http://www.ebi.ac.uk/projects/BARGEN/>) that suggested the following flags:

```
-shape 0.1 -lambda 50 -std
```

Setting the lambda values based on asymptotic arguments described by Hoggart et al. [20] either produced very few markers with non-zero coefficients or caused the program to crash.
